# Supplementary material for: p-type Phosphorus doped ZnO nanostructures: an electrical, optical, and magnetic properties study
Source: Royal Society of Chemistry journal article supplement (doi:10.1039/c2ra20441j), 2012-01-01
Supplement: c2ra20441j.pdf [file c2ra20441j.pdf]

# ***p*-type Phosphorus doped ZnO nanostructures: electrical, optical, and magnetic properties study**

**Bharati Panigrahy and D. Bahadur**

## **Supplementary information**

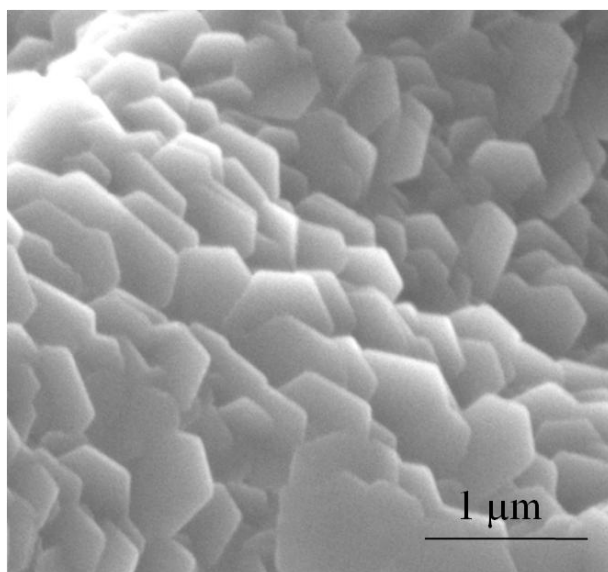

**Figure S1.** Cross sectional SEM image of ZnO:P nanoplatelets.
